# Supplementary material for: CrossFit®: ‘Unknowable’ or Predictable?—A Systematic Review on Predictors of CrossFit® Performance
Source: MDPI journal article supplement (doi:10.3390/sports11060112), 2023-05-30
Supplement: s1 [file s1]

**Table S1.** Overview of Benchmark and CrossFit® Open workouts [2,5,7]. Certain data included in the following table are derived from CrossFit®. © Copyright CrossFit®, LLC 2022. All Rights Reserved.

| CrossFit®-Benchmark and CrossFit® Open workouts |                                                                            |                                                                     |                                                      |                                                                                       |                                                                                                                                                                          |                                                                                                                                                                                                                                                        |
|-------------------------------------------------|----------------------------------------------------------------------------|---------------------------------------------------------------------|------------------------------------------------------|---------------------------------------------------------------------------------------|--------------------------------------------------------------------------------------------------------------------------------------------------------------------------|--------------------------------------------------------------------------------------------------------------------------------------------------------------------------------------------------------------------------------------------------------|
| Girl-WODs                                       | Cindy                                                                      | Grace                                                               | Fran                                                 | Isabel                                                                                | Kelly                                                                                                                                                                    | Nancy                                                                                                                                                                                                                                                  |
|                                                 | 20 min AMRAP of                                                            | For time:                                                           | For time:                                            | For time:                                                                             | For time:                                                                                                                                                                | For time:                                                                                                                                                                                                                                              |
|                                                 | 5 pull-ups<br>10 push-ups<br>15 air squats                                 | 30 clean and jerks<br>(135/95 lb.)                                  | 21-15-9 reps of<br>thrusters (95/65 lb.)<br>pull-ups | 30 snatches (135/95 lb)                                                               | 5 rounds of<br>400-m run<br>30 box jumps (24/20 in)<br>30 wall ball shots (20/14 lb)                                                                                     | 5 rounds of<br>400-m run<br>15 overhead squats (95/65 lb)                                                                                                                                                                                              |
| Hero-WODs                                       | Murph                                                                      | Benchmark-WODs                                                      | CrossFit® Total                                      | Donkey Kong                                                                           | Fight Gone Bad                                                                                                                                                           | Filthy 50                                                                                                                                                                                                                                              |
|                                                 | For time:                                                                  |                                                                     | Total sum of the best from<br>each lift:             | For time:                                                                             | Total reps:                                                                                                                                                              | For time:                                                                                                                                                                                                                                              |
|                                                 | 1-mile run<br>100 pull-ups<br>200 push-ups<br>300 air squats<br>1-mile run |                                                                     | back squat<br>shoulder press<br>deadlift             | 21-15-9 reps of<br>Burpees<br>kettlebell swings (50/35 lb.)<br>box jumps (24/20-inch) | 1-min wall balls (20/14 lb.)<br>1-min sumo deadlift high-pulls<br>(75/55 lb.)<br>1-min box jumps (24/20-inch)<br>1-min push press (75/55 lb.)<br>1-min row<br>1-min rest | 50 box jumps (24/20-inch)<br>50 jumping pull-ups<br>50 kettlebell swings (35/26 lb.)<br>50 walking lunge steps<br>50 knees-to-elbows<br>50 push press (45/35 lb.)<br>50 back extensions<br>50 wall balls (20/14 lb.)<br>50 burpees<br>50 double-unders |
|                                                 |                                                                            |                                                                     | Three attempts for each lift                         | Perform 6 Lunges after each<br>exercise                                               | Three rounds with a running clock                                                                                                                                        |                                                                                                                                                                                                                                                        |
| CrossFit® Open WODs                             |                                                                            |                                                                     |                                                      |                                                                                       |                                                                                                                                                                          |                                                                                                                                                                                                                                                        |
| 2016                                            | 16.1                                                                       | 16.2                                                                | 16.3                                                 | 16.4                                                                                  | 16.5                                                                                                                                                                     |                                                                                                                                                                                                                                                        |
|                                                 | 20 min AMRAP of                                                            | Beginning on a 4-min clock, complete AMRAP of                       | 7 min AMRAP of                                       | 13 min AMRAP of                                                                       | For time:                                                                                                                                                                |                                                                                                                                                                                                                                                        |
|                                                 |                                                                            | 25 toes-to-bars<br>50 double-unders                                 |                                                      |                                                                                       |                                                                                                                                                                          |                                                                                                                                                                                                                                                        |
|                                                 | 25-ft. overhead walking<br>lunge (95/65 lb.)<br>8 burpees                  | 15 squat cleans (135/85 lb.)                                        |                                                      | 55 deadlifts (225/155 lb.)                                                            |                                                                                                                                                                          |                                                                                                                                                                                                                                                        |
|                                                 | 25-ft. overhead walking<br>lunge (95/65 lb.)                               | If completed before 4 min, add 4 min to the clock and<br>proceed to | 10 power snatches (75/55 lb.)                        | 55 wall-ball shots (20/14-lb.<br>ball to 10/9-ft. target)                             | 21-18-15-12-9-6-3 reps of<br>thrusters (95/65 lb.)                                                                                                                       |                                                                                                                                                                                                                                                        |
|                                                 | 8 chest-to-bar pull-ups                                                    | 25 toes-to-bars<br>50 double-unders                                 | 3 bar muscle-ups                                     | 55-calorie row                                                                        | burpees                                                                                                                                                                  |                                                                                                                                                                                                                                                        |
|                                                 |                                                                            | 13 squat cleans (185/115 lb.)                                       |                                                      | 55 handstand push-ups                                                                 |                                                                                                                                                                          |                                                                                                                                                                                                                                                        |
|                                                 |                                                                            | If completed before 8 min, add 4 min to the clock and<br>proceed to |                                                      |                                                                                       |                                                                                                                                                                          |                                                                                                                                                                                                                                                        |

| <p>25 toes-to-bars<br/> 50 double-unders<br/> 11 squat cleans (225/145 lb.)<br/> <i>If completed before 12 min, add 4 min to the clock and proceed to</i><br/> 25 toes-to-bars<br/> 50 double-unders<br/> 9 squat cleans (275/175 lb.)<br/> <i>If completed before 16 min, add 4 min to the clock and proceed to</i><br/> 25 toes-to-bars<br/> 50 double-unders<br/> 7 squat cleans (315/205 lb.)</p> |                                          |                                                                                                                        |                                                                                                                                  |                                                                                                                                 |                                             |
|-------------------------------------------------------------------------------------------------------------------------------------------------------------------------------------------------------------------------------------------------------------------------------------------------------------------------------------------------------------------------------------------------------|------------------------------------------|------------------------------------------------------------------------------------------------------------------------|----------------------------------------------------------------------------------------------------------------------------------|---------------------------------------------------------------------------------------------------------------------------------|---------------------------------------------|
| 2017                                                                                                                                                                                                                                                                                                                                                                                                  | 17.1                                     | 17.2                                                                                                                   | 17.3                                                                                                                             | 17.4                                                                                                                            | 17.5                                        |
|                                                                                                                                                                                                                                                                                                                                                                                                       | <i>For time:</i>                         | <i>12 min AMRAP of alternating 2 rounds of</i>                                                                         | <i>Prior to 8:00, complete 3 rounds of</i>                                                                                       | <i>13 min AMRAP of</i>                                                                                                          | <i>10 rounds for time of</i>                |
|                                                                                                                                                                                                                                                                                                                                                                                                       | 10 dumbbell snatches<br>(50/35 lb.)      |                                                                                                                        | 6 chest-to-bar pull-ups<br>6 squat snatches (95/65 lb.)<br><i>Then, 3 rounds of</i>                                              |                                                                                                                                 |                                             |
|                                                                                                                                                                                                                                                                                                                                                                                                       | 15 burpee box jump-overs<br>(24/20-inch) |                                                                                                                        | 7 chest-to-bar pull-ups<br>5 squat snatches (135/95 lb.)<br><i>*Prior to 12:00, complete 3 rounds of</i>                         |                                                                                                                                 |                                             |
|                                                                                                                                                                                                                                                                                                                                                                                                       | 20 dumbbell snatches<br>(50/35 lb.)      |                                                                                                                        | 8 chest-to-bar pull-ups<br>4 squat snatches (185/135 lb.)<br><i>*Prior to 16:00, complete 3 rounds of</i>                        |                                                                                                                                 |                                             |
|                                                                                                                                                                                                                                                                                                                                                                                                       | 15 burpee box jump-overs<br>(24/20-inch) | 50-ft. weighted walking lunge (50/35 lb.)<br>16 toes-to-bars<br>8 power cleans (50/35 lb.)<br><i>Then, 2 rounds of</i> | 9 chest-to-bar pull-ups<br>3 squat snatches (225/155 lb.)<br><i>*Prior to 20:00, complete 3 rounds of</i>                        | 55 deadlifts (225/155 lb.)<br>55 wall-ball shots (20/14-lb. ball to 10/9-ft. target)<br>55-calorie row<br>55 handstand push-ups |                                             |
|                                                                                                                                                                                                                                                                                                                                                                                                       | 30 dumbbell snatches<br>(50/35 lb.)      | 50-ft. weighted walking lunge (50/35 lb.)<br>16 bar muscle-ups<br>8 power cleans (50/35 lb.)                           | 10 chest-to-bar pull-ups<br>2 squat snatches (245/175 lb.)<br><i>Prior to 24:00, complete 3 rounds of</i>                        |                                                                                                                                 | 9 thrusters (95/65 lb.)<br>35 double-unders |
|                                                                                                                                                                                                                                                                                                                                                                                                       | 15 burpee box jump-overs<br>(24/20-inch) |                                                                                                                        | 11 chest-to-bar pull-ups<br>1 squat snatch (265/185 lb.)<br><i>*If all repetitions are completed, time cap extends by 4 min.</i> |                                                                                                                                 |                                             |
|                                                                                                                                                                                                                                                                                                                                                                                                       | 40 dumbbell snatches<br>(50/35 lb.)      |                                                                                                                        |                                                                                                                                  |                                                                                                                                 |                                             |
|                                                                                                                                                                                                                                                                                                                                                                                                       | 15 burpee box jump-overs<br>(24/20-inch) |                                                                                                                        |                                                                                                                                  |                                                                                                                                 |                                             |
|                                                                                                                                                                                                                                                                                                                                                                                                       | 50 dumbbell snatches<br>(50/35 lb.)      |                                                                                                                        |                                                                                                                                  |                                                                                                                                 |                                             |
|                                                                                                                                                                                                                                                                                                                                                                                                       | 15 burpee box jump-overs<br>(24/20-inch) |                                                                                                                        |                                                                                                                                  |                                                                                                                                 |                                             |
| 2018                                                                                                                                                                                                                                                                                                                                                                                                  | 18.1                                     | 18.2a                                                                                                                  | 18.2b                                                                                                                            | 18.3                                                                                                                            | 18.4                                        |
|                                                                                                                                                                                                                                                                                                                                                                                                       | <i>20 min AMRAP of</i>                   | <i>For time:</i>                                                                                                       | <i>1-RM of</i>                                                                                                                   | <i>For time:</i>                                                                                                                | <i>For time:</i>                            |
|                                                                                                                                                                                                                                                                                                                                                                                                       |                                          |                                                                                                                        |                                                                                                                                  |                                                                                                                                 | <i>7 min AMRAP of</i>                       |

|                                                                                 |                                                                                      |                                                                     |                                                                                                                                                                                                                   |                                                                                                                                                                                                                                                                                                                                          |                                                                                                                                                                                                                                                                                                                                                                                                                                                                     |
|---------------------------------------------------------------------------------|--------------------------------------------------------------------------------------|---------------------------------------------------------------------|-------------------------------------------------------------------------------------------------------------------------------------------------------------------------------------------------------------------|------------------------------------------------------------------------------------------------------------------------------------------------------------------------------------------------------------------------------------------------------------------------------------------------------------------------------------------|---------------------------------------------------------------------------------------------------------------------------------------------------------------------------------------------------------------------------------------------------------------------------------------------------------------------------------------------------------------------------------------------------------------------------------------------------------------------|
| 8 toes-to-bar<br>10 dumbbell hang clean and jerks (50/35 lb.)<br>14-calorie row | 1-2-3-4-5-6-7-8-9-10 reps<br>of<br>dumbbell squats (50/35 lb.)<br>bar-facing burpees | clean<br><br><i>Time cap: 12 minutes to complete 18.2 and 18.2a</i> | 2 rounds of<br>100 double-unders<br>20 overhead squats (115/80 lb.)<br>100 double-unders<br>12 ring muscle-ups<br>100 double-unders<br>20 dumbbell snatches (50/35 lb.)<br>100 double-unders<br>12 bar muscle-ups | 21 deadlifts (225/155 lb.)<br>21 handstand push-ups<br>15 deadlifts, (225/155 lb.)<br>15 handstand push-ups<br>9 deadlifts, (225/155 lb.)<br>9 handstand push-ups<br>21 deadlifts, (315/205 lb.)<br>50-ft. handstand walk<br>15 deadlifts, (315/205 lb.)<br>50-ft. handstand walk<br>9 deadlifts, (315/205 lb.)<br>50-ft. handstand walk | 3 thrusters (100/65 lb.)<br>3 chest-to-bar pull-ups<br>6 thrusters (100/65 lb.)<br>6 chest-to-bar pull-ups<br>9 thrusters (100/65 lb.)<br>9 chest-to-bar pull-ups<br>12 thrusters (100/65 lb.)<br>12 chest-to-bar pull-ups<br>15 thrusters (100/65 lb.)<br>15 chest-to-bar pull-ups<br>18 thrusters (100/65 lb.)<br>18 chest-to-bar pull-ups<br><i>This is a timed workout. If you complete the round of 18, go on to 21. If you complete 21, go on to 24, etc.</i> |
|---------------------------------------------------------------------------------|--------------------------------------------------------------------------------------|---------------------------------------------------------------------|-------------------------------------------------------------------------------------------------------------------------------------------------------------------------------------------------------------------|------------------------------------------------------------------------------------------------------------------------------------------------------------------------------------------------------------------------------------------------------------------------------------------------------------------------------------------|---------------------------------------------------------------------------------------------------------------------------------------------------------------------------------------------------------------------------------------------------------------------------------------------------------------------------------------------------------------------------------------------------------------------------------------------------------------------|

| 2019 | 19.1                                                                  | 19.2                                                                                                                                                                                                                                                                                                                                                                                                                                                                                                                                                                                                                                                          | 19.3                                                                                                                                                                                            | 19.4                                                                                                                                                                                                                             | 19.5                                                                                                                     |
|------|-----------------------------------------------------------------------|---------------------------------------------------------------------------------------------------------------------------------------------------------------------------------------------------------------------------------------------------------------------------------------------------------------------------------------------------------------------------------------------------------------------------------------------------------------------------------------------------------------------------------------------------------------------------------------------------------------------------------------------------------------|-------------------------------------------------------------------------------------------------------------------------------------------------------------------------------------------------|----------------------------------------------------------------------------------------------------------------------------------------------------------------------------------------------------------------------------------|--------------------------------------------------------------------------------------------------------------------------|
|      | 15 min AMRAP of                                                       | Beginning on an 8-min clock, complete AMRAP of<br>25 toes-to-bars<br>50 double-unders<br>15 squat cleans (135/85 lb.)<br>25 toes-to-bars<br>50 double-unders<br>13 squat cleans, (185/115 lb.)<br><i>If completed before 8 min, add 4 min to the clock and proceed to:</i><br>25 toes-to-bars<br>50 double-unders<br>11 squat cleans, (225/145 lb.)<br><i>If completed before 12 min, add 4 min to the clock and proceed to:</i><br>25 toes-to-bars<br>50 double-unders<br>9 squat cleans, (275/175 lb.)<br><i>If completed before 16 min, add 4 min to the clock and proceed to:</i><br>25 toes-to-bars<br>50 double-unders<br>7 squat cleans, (315/205 lb.) | For time:<br><br><br><br><br><br><br><br><br><br>200-ft. dumbbell overhead lunge (50/35 lb.)<br>50 dumbbell box step-ups (24/20-inch)<br>50 strict handstand push-ups<br>200-ft. handstand walk | For time:<br><br><br><br><br><br><br><br><br><br>3 rounds of<br>10 snatches (95/65 lb.)<br>12 bar-facing burpees<br><i>Then, rest 3 minutes before continuing with 3 rounds of</i><br>10 bar muscle-ups<br>12 bar-facing burpees | For time:<br><br><br><br><br><br><br><br><br><br>33-27-21-15-9 reps of<br>thrusters (95/65 lb.)<br>chest-to-bar pull-ups |
|      | 19 wall-ball shots (20/14-lb. ball to 10/9-ft. target)<br>19-cal. row |                                                                                                                                                                                                                                                                                                                                                                                                                                                                                                                                                                                                                                                               |                                                                                                                                                                                                 |                                                                                                                                                                                                                                  |                                                                                                                          |
| 2020 | 20.1                                                                  | 20.2                                                                                                                                                                                                                                                                                                                                                                                                                                                                                                                                                                                                                                                          | 20.3                                                                                                                                                                                            | 20.4                                                                                                                                                                                                                             | 20.5                                                                                                                     |

| <i>For time:</i>                                                             | <i>20 min AMRAP of</i>                                                | <i>For time:</i>                                                                                                                                                                                                                                                                                                                                       | <i>For time:</i>                                                                                                                                                                                                                                                                                                                                                               | <i>For time:</i>                                                                                                                                       |
|------------------------------------------------------------------------------|-----------------------------------------------------------------------|--------------------------------------------------------------------------------------------------------------------------------------------------------------------------------------------------------------------------------------------------------------------------------------------------------------------------------------------------------|--------------------------------------------------------------------------------------------------------------------------------------------------------------------------------------------------------------------------------------------------------------------------------------------------------------------------------------------------------------------------------|--------------------------------------------------------------------------------------------------------------------------------------------------------|
| 10 rounds of<br>8 ground to overhead<br>(95/65 lb.)<br>10 bar-facing burpees | 4 dumbbell thrusters (50/35 lb.)<br>6 toes-to-bar<br>24 double-unders | 21 deadlifts (225 lb/155 lb)<br>21 handstand push-ups<br>15 deadlifts, (225 lb/155 lb)<br>15 handstand push-ups<br>9 deadlifts, (225 lb/155 lb)<br>9 handstand push-ups<br>21 deadlifts, (315 lb/205 lb)<br>50-ft. handstand walk<br>15 deadlifts, (315 lb/205 lb).<br>50-ft. handstand walk<br>9 deadlifts, (315 lb/205 lb).<br>50-ft. handstand walk | 30 box jumps (24/20-inch)<br>15 clean and jerks (95/65 lb.)<br>30 box jumps (24/20-inch)<br>15 clean and jerks (135/85 lb.)<br>30 box jumps (24/20-inch)<br>10 clean and jerks (185/115 lb.)<br>30 single-leg squats<br>10 clean and jerks (225/145 lb.)<br>30 single-leg squats<br>5 clean and jerks (275/175 lb.)<br>30 single-leg squats<br>5 clean and jerks (315/205 lb.) | 20 min to complete the<br>following work in any order<br>40 muscle-ups<br>80-calorie row<br>120 wall ball shots (20/14-lb.<br>ball to 10/9-ft. target) |

**Note.** Weights are given in brackets, separated by gender (male/female). As many rounds or repetitions as possible (AMRAP); Repetitions (Reps).
